# Supplementary material
Source: PubMed Central journal article supplement (PMC8169057)
Supplement: NIHMS1017957-supplement-1.pdf [file NIHMS1017957-supplement-1.pdf]

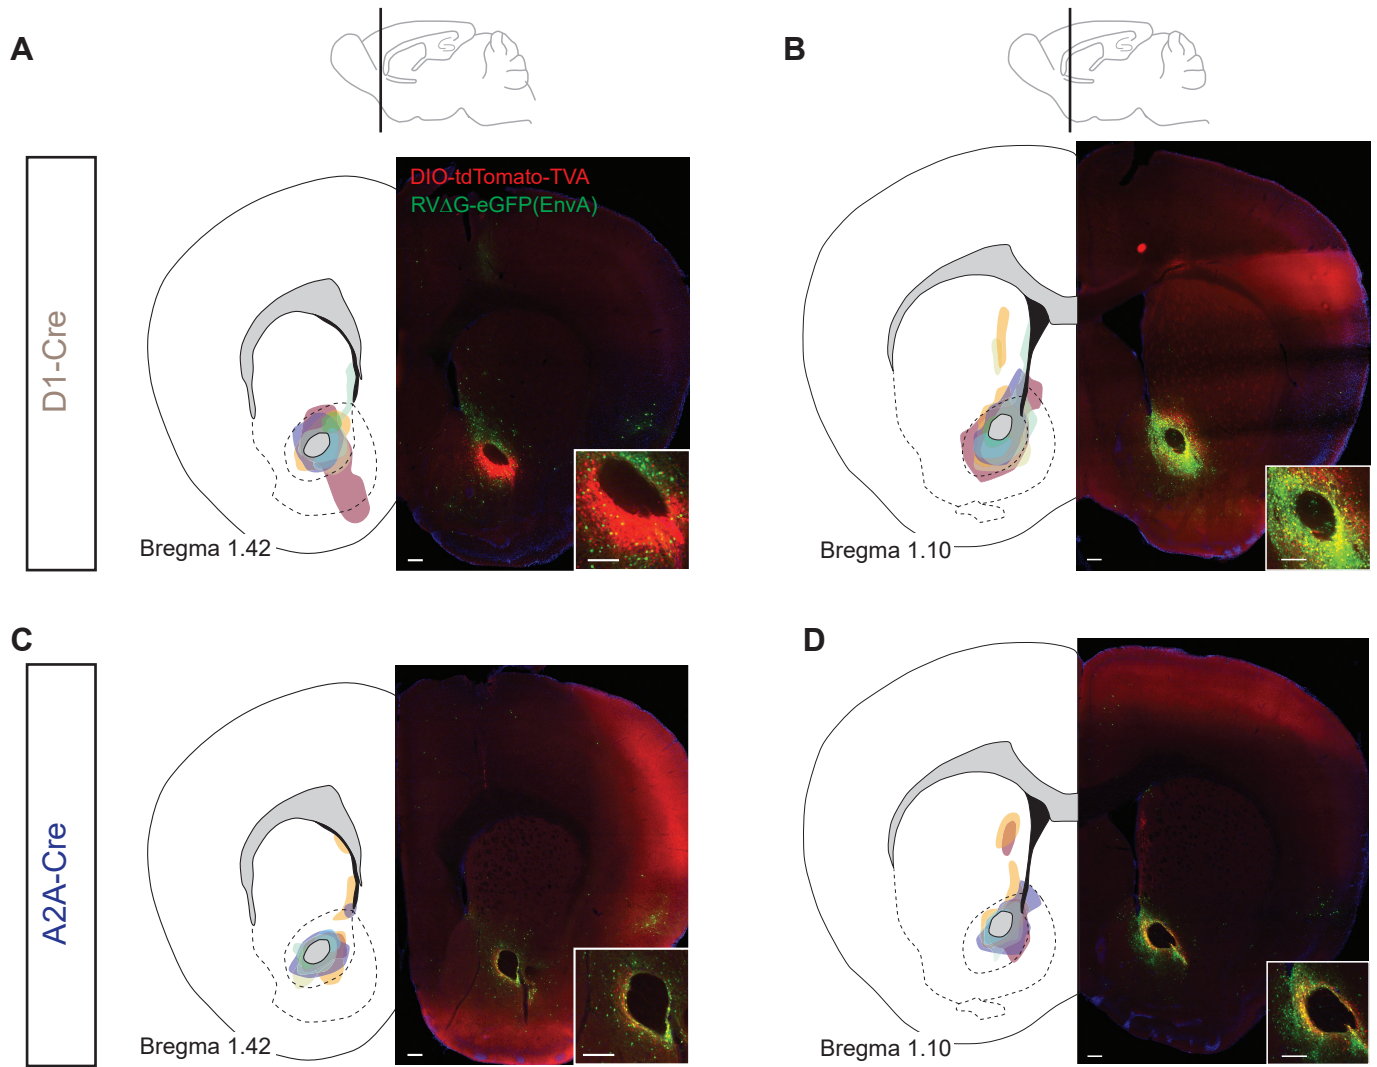

Supplementary Figure. 1

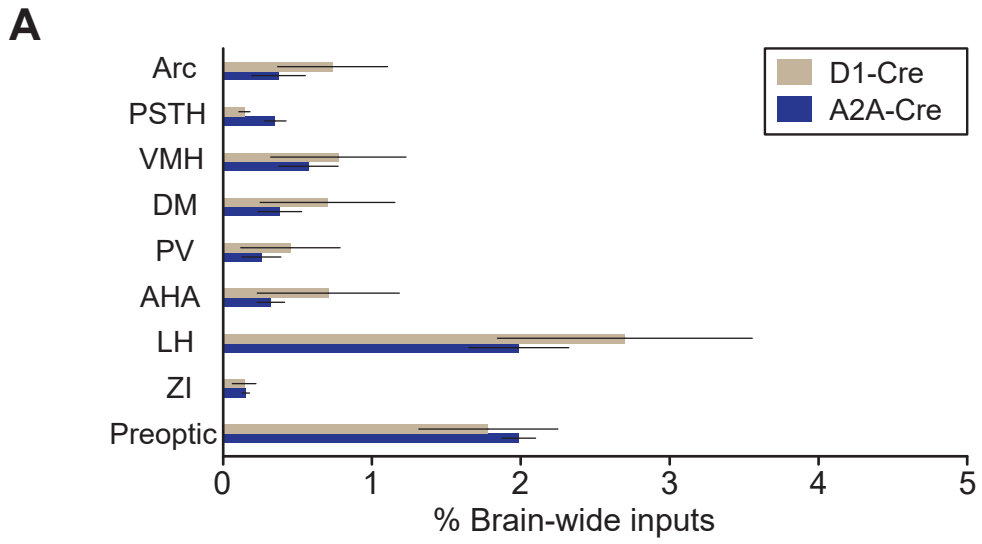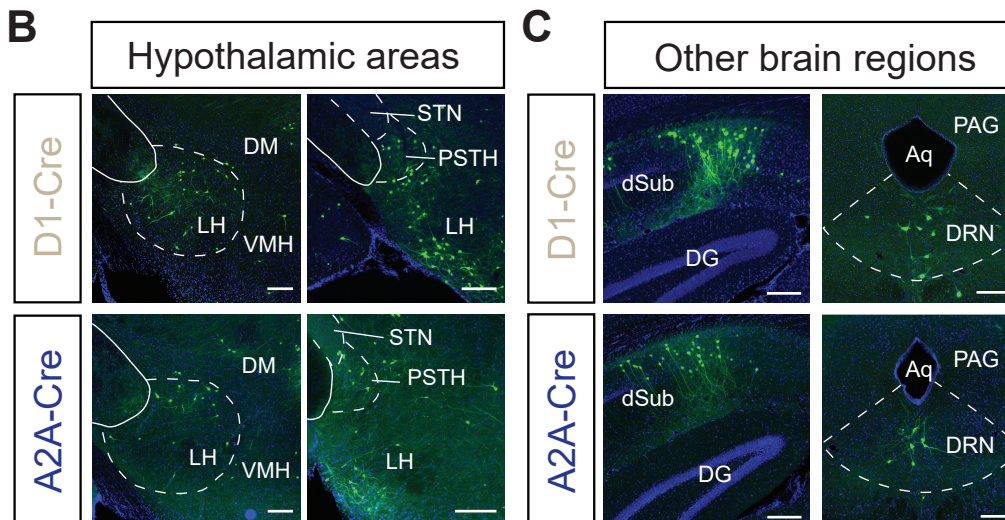

### BLA dendrites

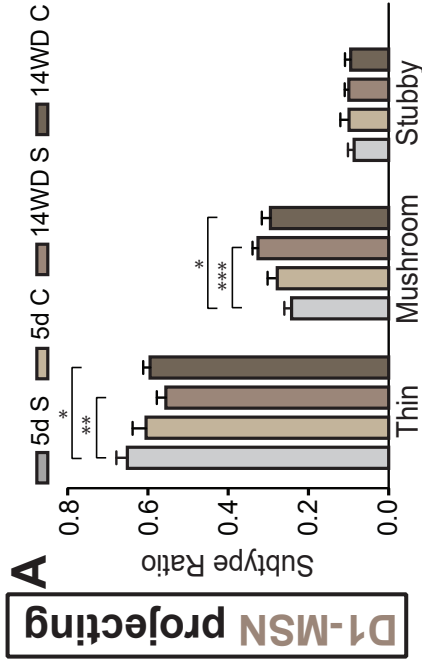

### apical dendrites, vHPC

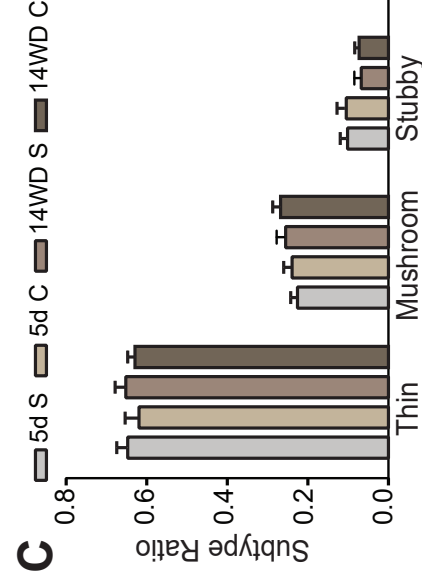

### basal dendrites, vHPC

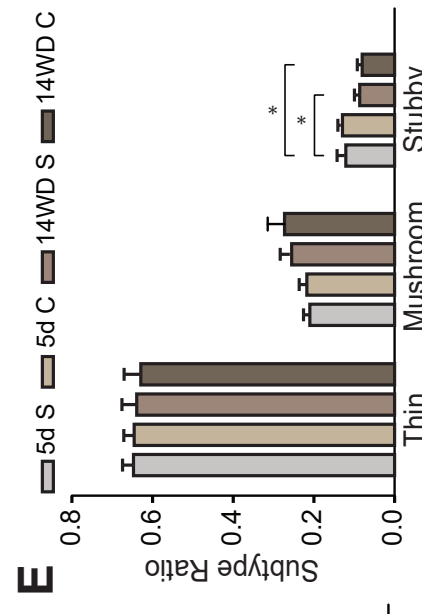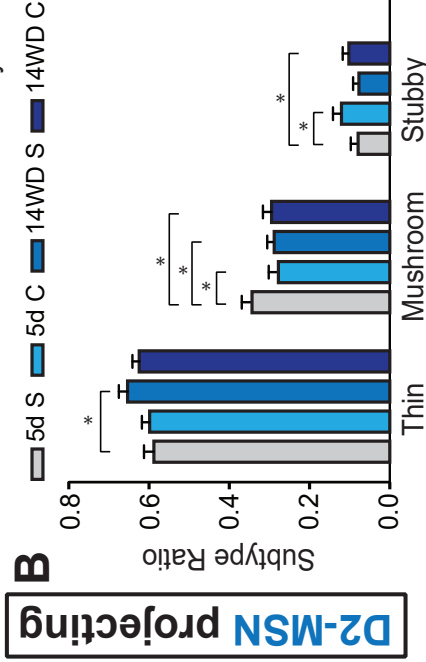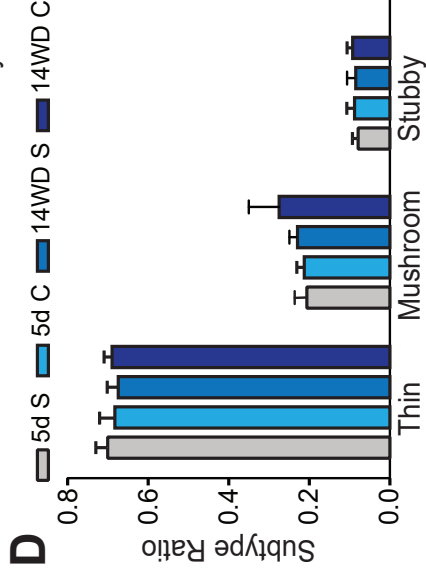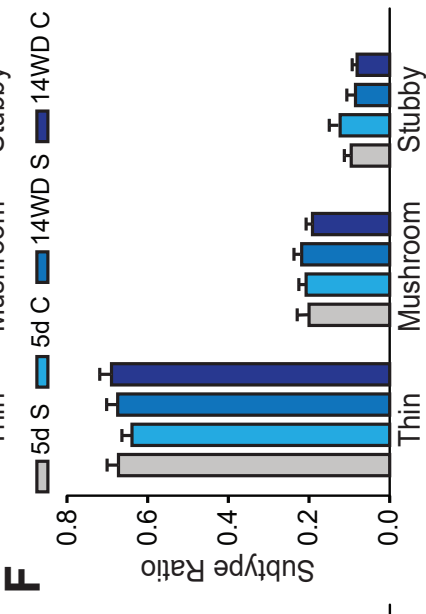

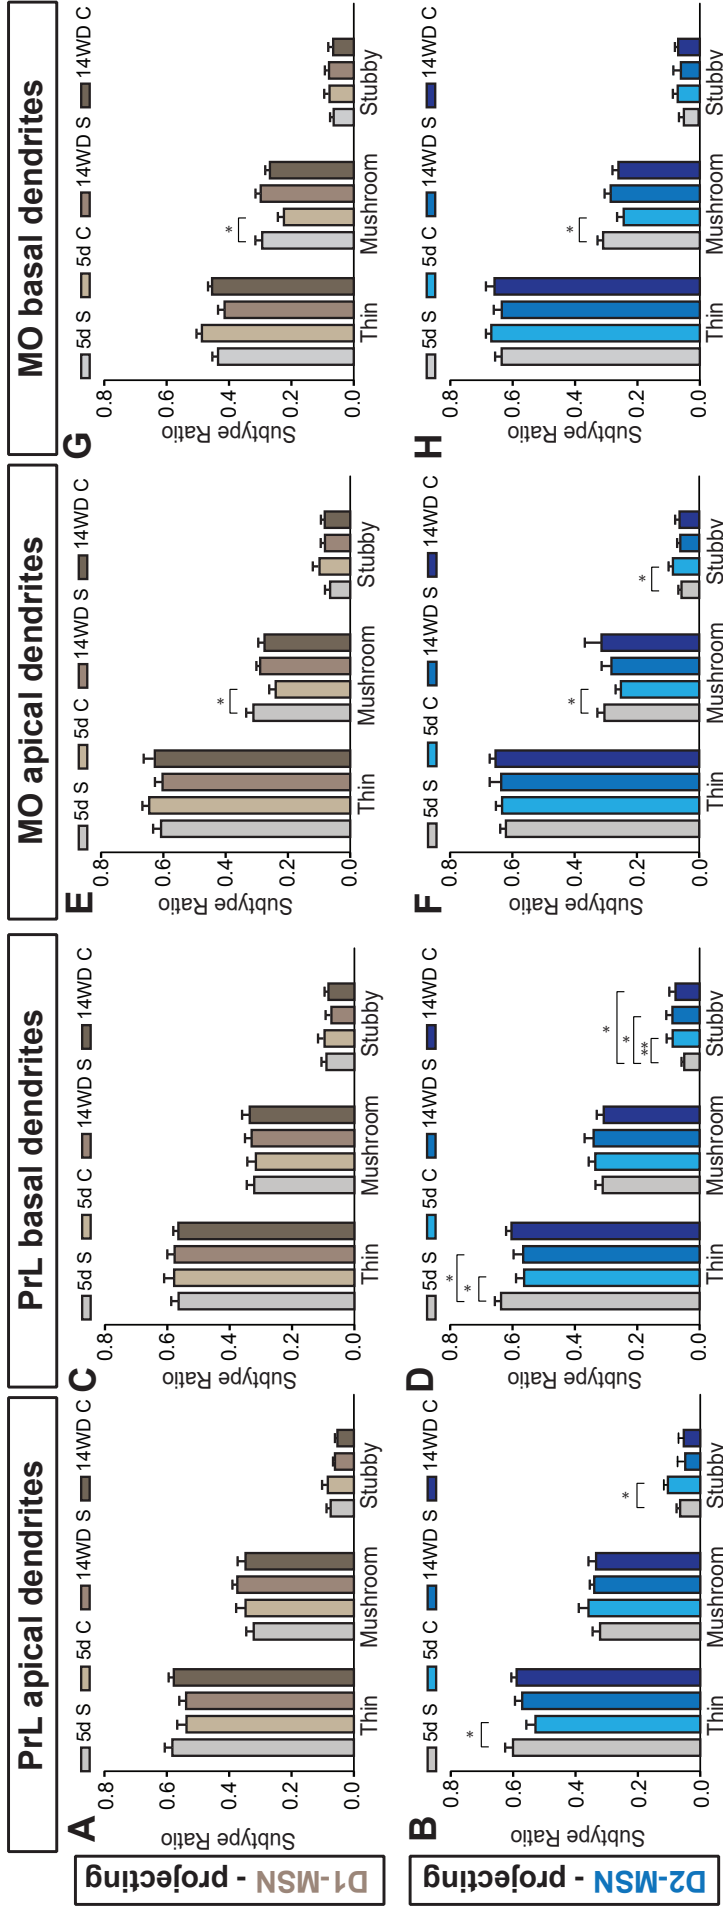

Supplementary Figure. 4
